# Supplementary material
Source: publisher site journal article supplement (https://www.dovepress.com/article/268504)
Supplement: Supplementary file 1 [file get_supplementary_file.php]

eTable 1 Mean SUVR of the white matter regions of interest in each group

|  |  |  |  |  |  |
| --- | --- | --- | --- | --- | --- |
|  |  |  |  |  |  |
| Region | TBI focal |  | TBI DAI |  | HC |
|  |  |  |  |  |  |
| Corpus callosum | 1.653 ± 0.143 |  | 1.740 ± 0.266 |  | 1.697 ± 0.089 |
|  | (0.532) |  | (0.682) |  |  |
|  |  |  |  |  |  |
| Cerebral peduncle | 1.692 ± 0.074 |  | 1.746 ± 0.185 |  | 1.628 ± 0.088 |
|  | (0.025) |  | (0.076) |  |  |
|  |  |  |  |  |  |
| Sagittal stratuma | 1.843 ± 0.128 |  | 2.004 ± 0.199 |  | 1.779 ± 0.098 |
|  | (0.110) |  | (0.0001)* |  |  |
|  |  |  |  |  |  |
| Cingulum | 1.598 ± 0.136 |  | 1.721 ± 0.208 |  | 1.565 ± 0.102 |
|  | (0.773) |  | (0.023) |  |  |
|  |  |  |  |  |  |
| Fornix | 1.249 ± 0.184 |  | 1.371 ± 0.221 |  | 1.447 ± 0.093 |
|  | (0.0002)* |  | (0.103) |  |  |
|  |  |  |  |  |  |
| Superior longitudinal fasciculus | 1.940 ± 0.153 |  | 2.087 ± 0.229 |  | 1.874 ± 0.087 |
|  | (0.356) |  | (0.001)* |  |  |
|  |  |  |  |  |  |
| Uncinate | 1.353 ± 0.104 |  | 1.473 ± 0.231 |  | 1.358 ± 0.108 |
|  | (0.967) |  | (0.130) |  |  |
|  |  |  |  |  |  |
| Results are expressed as the mean ± SD (p-value). Wilcoxon rank sum test, *p < 0.05, family-wise error | | | | | |
| SUVR: standardized uptake value ratio, TBI: traumatic brain injury, DAI: diffuse axonal injury, HC: healthy control, SD: standard deviation | | | | | |
| aIncluding the inferior longitudinal fasciculus and inferior fronto-occipital fasciculus | | | | | |

eTable 2 Mean SUVR using the brainstem as the reference region in each group

|  |  |  |  |  |  |
| --- | --- | --- | --- | --- | --- |
|  |  |  |  |  |  |
| Region | TBI focal |  | TBI DAI |  | HC |
| Frontal cortex | 0.634 ± 0.097 |  | 0.666 ± 0.056 |  | 0.668 ± 0.066 |
|  | (0.040) |  | (0.820) |  |  |
|  |  |  |  |  |  |
| Parietal cortex | 0.721 ± 0.079 |  | 0.753 ± 0.061 |  | 0.736 ± 0.068 |
|  | (0.208) |  | (0.388) |  |  |
|  |  |  |  |  |  |
| Occipital cortex | 0.791 ± 0.065 |  | 0.810 ± 0.067 |  | 0.774 ± 0.053 |
|  | (0.690) |  | (0.082) |  |  |
|  |  |  |  |  |  |
| Temporal cortex | 0.691 ± 0.048 |  | 0.735 ± 0.048 |  | 0.711 ± 0.065 |
|  | (0.198) |  | (0.059) |  |  |
|  |  |  |  |  |  |
| Subcortical region | 0.833 ± 0.069 |  | 0.882 ± 0.082 |  | 0.909 ± 0.034 |
|  | (0.005)* |  | (0.368) |  |  |
|  |  |  |  |  |  |
| Results are expressed as the mean ± SD (p-value). Wilcoxon rank sum test, *p < 0.05, family-wise error | | | | | |
| SUVR: standardized uptake value ratio, TBI: traumatic brain injury, SD: standard deviation, DAI: diffuse axonal injury, HC: healthy control | | | | | |
|  | | | | | |
|  |  |  |  |  |  |
